# Supplementary material
Source: bioRxiv or medRxiv preprint supplement (https://medrxiv.org/highwire/filestream/86978/field_highwire_adjunct_files/0/2020.06.21.20136432-1.pdf)
Supplement: Supplementary file [file 2020.06.21.20136432-1.pdf]

**eFigure I. Study participant flow chart**

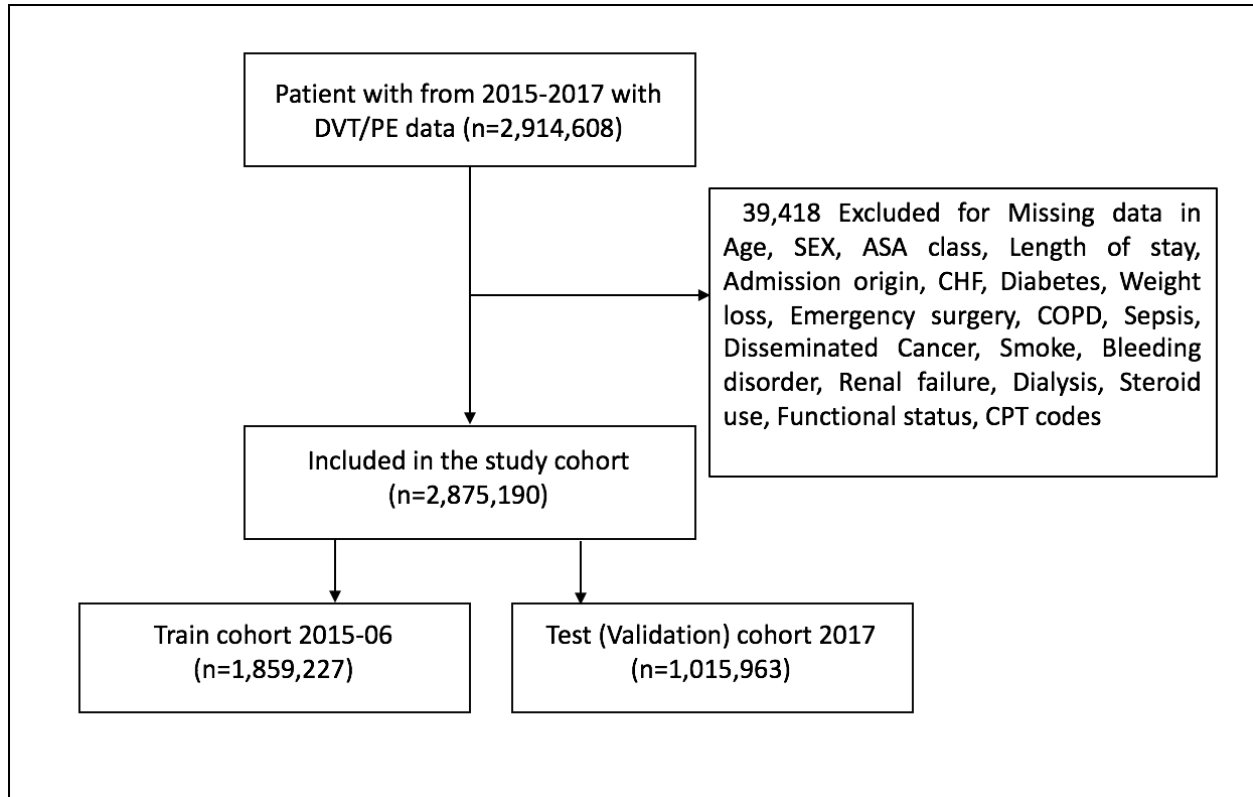

**eFigure II. Calibration plot for 30-day postoperative VTE (Model with hospital length of stay) Observed vs expected VTE risk**

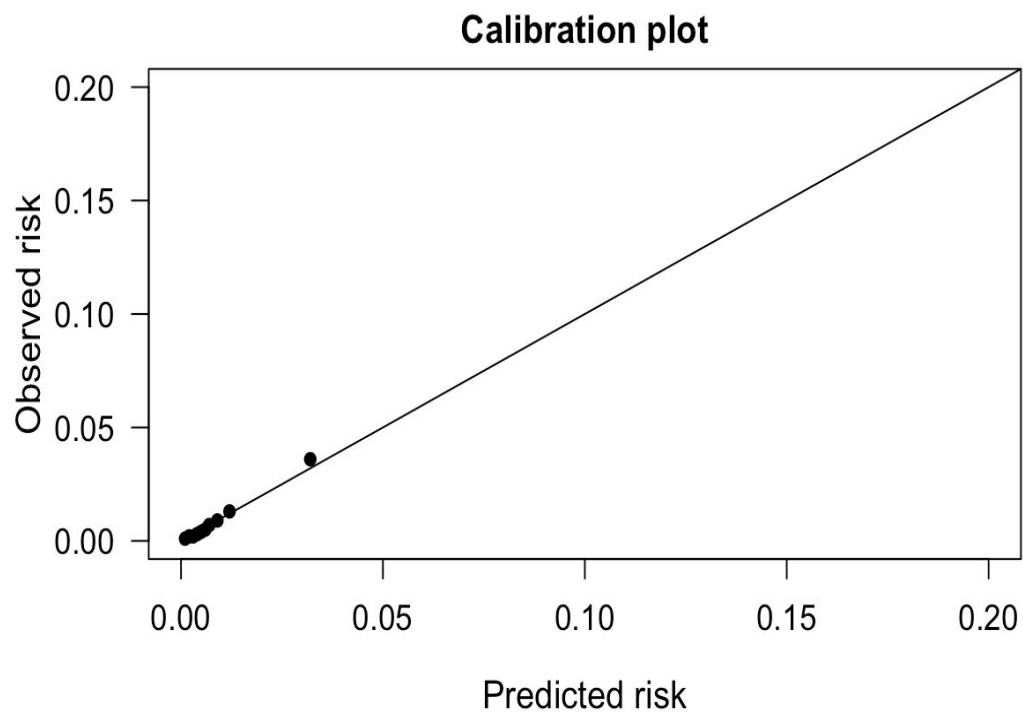

**eFigure III. Calibration plot for 30-day postoperative VTE (Model without length of stay).  
Observed vs expected VTE risk**

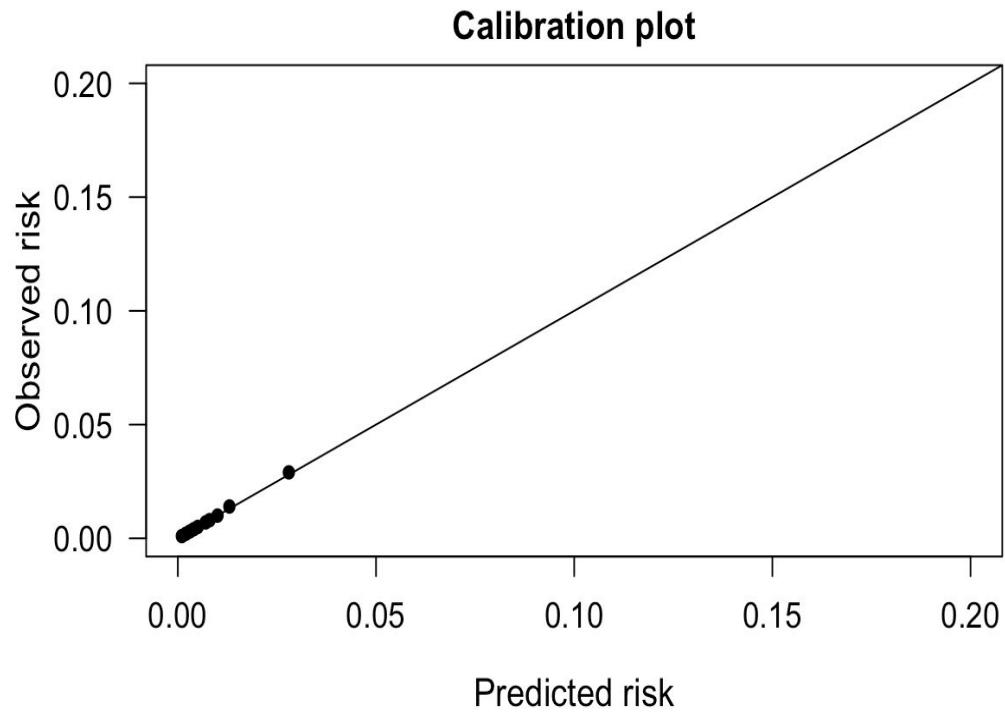

**eFigure IV. Mobile web-application of VTE prediction model**

| Prediction Model                                                                                                                                                                                                                                                                                                                                                                                                                                                                                                                                                                                                                                                                                                                                                                                                                                                                                                                                                                                                                                                                                                                                                                                       | Prediction Model                                                                                                                                                                                                                                                                                                                                                                                              |
|--------------------------------------------------------------------------------------------------------------------------------------------------------------------------------------------------------------------------------------------------------------------------------------------------------------------------------------------------------------------------------------------------------------------------------------------------------------------------------------------------------------------------------------------------------------------------------------------------------------------------------------------------------------------------------------------------------------------------------------------------------------------------------------------------------------------------------------------------------------------------------------------------------------------------------------------------------------------------------------------------------------------------------------------------------------------------------------------------------------------------------------------------------------------------------------------------------|---------------------------------------------------------------------------------------------------------------------------------------------------------------------------------------------------------------------------------------------------------------------------------------------------------------------------------------------------------------------------------------------------------------|
| <h3 data-bbox="207 678 669 758">Venous Thromboembolism Risk Model</h3> <p data-bbox="232 821 683 846">* 30-day postoperative risk of DVT and/or PE</p> <p data-bbox="232 877 342 913">Age: <input data-bbox="280 877 342 913" type="text" value="67"/></p> <p data-bbox="232 940 643 976">History of disseminated cancer: <input data-bbox="557 940 643 976" type="button" value="Yes"/></p> <p data-bbox="232 1003 526 1039">Chronic steroid use: <input data-bbox="440 1003 526 1039" type="button" value="Yes"/></p> <p data-bbox="232 1066 654 1102">Sepsis prior to surgery: <input data-bbox="472 1066 654 1102" type="button" value="No"/></p> <p data-bbox="232 1129 647 1165">Hypoalbuminemia (&lt;=2.5 g/dL) : <input data-bbox="557 1129 647 1165" type="button" value="Yes"/></p> <p data-bbox="232 1192 613 1228">Platelet &gt;=450(x1000/mcL) : <input data-bbox="526 1192 613 1228" type="button" value="No"/></p> <p data-bbox="232 1255 380 1270">Surgery Type :</p> <p data-bbox="232 1276 760 1312"><input data-bbox="232 1276 760 1312" type="button" value="Spine"/></p> <p data-bbox="232 1367 347 1402"><input data-bbox="232 1367 347 1402" type="button" value="submit"/></p> | <h3 data-bbox="784 737 888 772">Result</h3> <p data-bbox="808 842 1271 913"><b>30-day Venous Thromboembolism Risk: 6.47%</b></p> <p data-bbox="813 1045 948 1081"><input data-bbox="813 1045 948 1081" type="button" value="Go back"/></p> <p data-bbox="784 1192 1352 1291">* Venous Thromboembolism Risk: defined by 30-day postoperative occurrence of deep vein thrombosis and/or pulmonary embolism.</p> |

**eFigure V. Average day from operation until DVT complication according to surgery type**

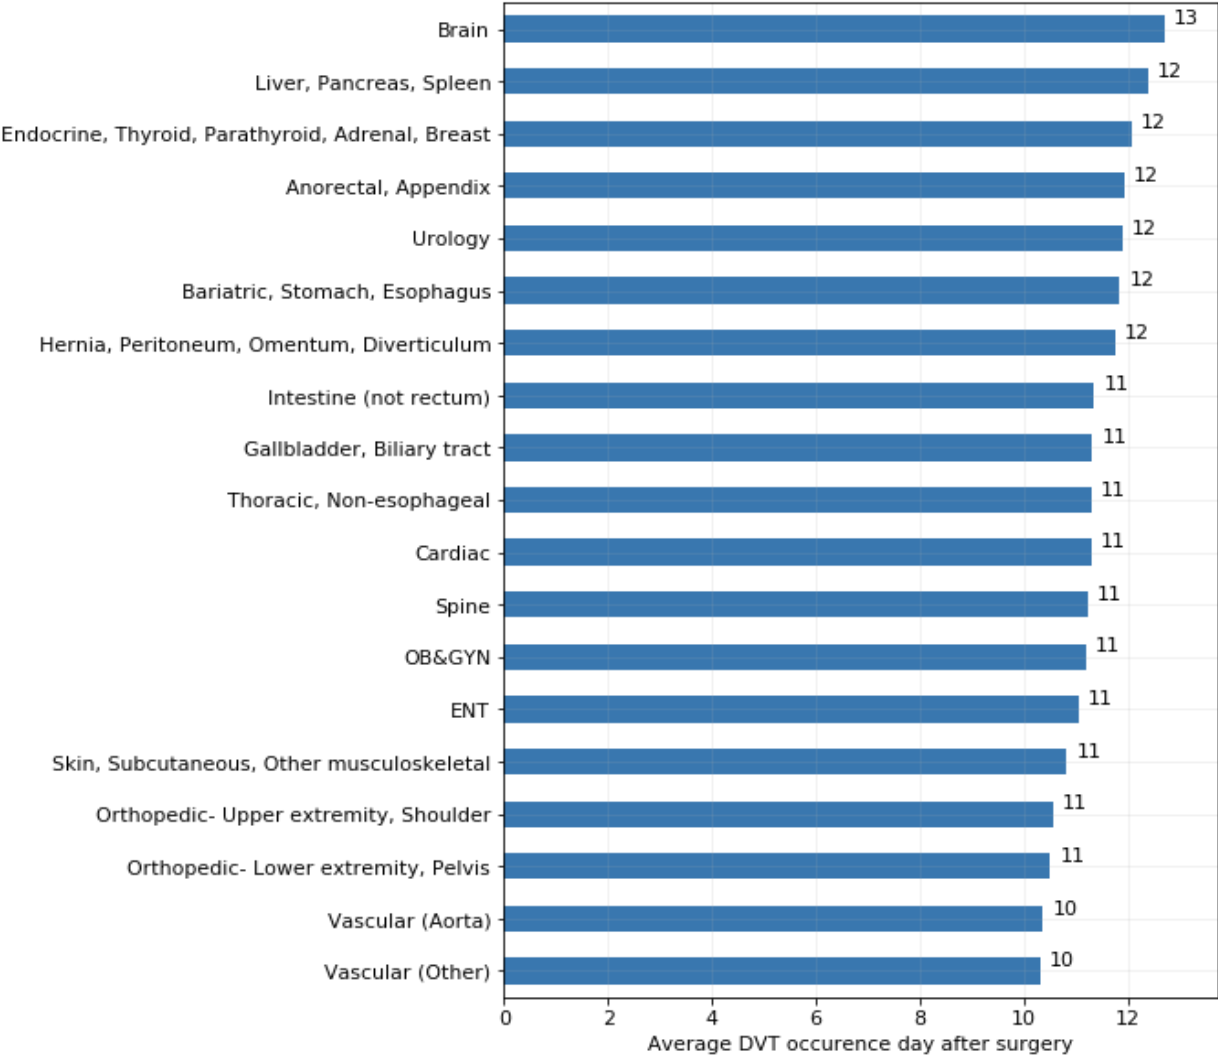

**Table I. Predictors of VTE predictors (without length of stay)**

|                                                     | Adjusted odds ratio | Coefficient | SE    | P-value |
|-----------------------------------------------------|---------------------|-------------|-------|---------|
| Intercept                                           |                     | -6.881      | 0.146 | <0.001  |
| Age                                                 | 1.02 (1.02-1.02)    | 0.017       | 0.001 | <0.001  |
| Steroid use                                         | 1.54 (1.45-1.64)    | 0.432       | 0.031 | <0.001  |
| Disseminated cancer                                 | 2.03 (1.91-2.16)    | 0.709       | 0.031 | <0.001  |
| Albumin $\leq$ 2.5 g/dL                             | 1.88 (1.75-2.01)    | 0.629       | 0.034 | <0.001  |
| Sepsis (reference =none)                            |                     |             |       |         |
| SIRS                                                | 1.95 (1.82-2.1)     | 0.669       | 0.036 | <0.001  |
| Sepsis                                              | 2.29 (2.12-2.46)    | 0.827       | 0.038 | <0.001  |
| Septic Shock                                        | 3.34 (2.99-3.73)    | 1.206       | 0.056 | <0.001  |
| Platelet ( $\times 10^9/L$ ) (reference=0-449)      |                     |             |       |         |
| $\geq$ 450                                          | 1.54 (1.42-1.67)    | 0.433       | 0.041 | <0.001  |
| Surgery type<br>(reference =ENT)                    |                     |             |       |         |
| anorectal, appendix                                 | 1.2 (0.89-1.62)     | 0.184       | 0.152 | 0.227   |
| bariatric, stomach, esophagus                       | 3.73 (2.8-4.97)     | 1.317       | 0.146 | <0.001  |
| brain                                               | 8.93 (6.68-11.95)   | 2.190       | 0.148 | <0.001  |
| cardiac                                             | 4.58 (3.28-6.38)    | 1.521       | 0.170 | <0.001  |
| endocrine, thyroid, parathyroid,<br>adrenal, breast | 0.85 (0.63-1.14)    | -0.163      | 0.152 | 0.283   |
| gallbladder, biliary tract                          | 1.06 (0.78-1.43)    | 0.056       | 0.152 | 0.714   |
| hernia, peritoneum, omentum,                        | 1.71 (1.29-2.28)    | 0.536       | 0.146 | <0.001  |

|                                              |                   |       |       |        |
|----------------------------------------------|-------------------|-------|-------|--------|
| diverticulum                                 |                   |       |       |        |
| intestine (not rectum)                       | 4.82 (3.64-6.38)  | 1.572 | 0.144 | <0.001 |
| liver, pancreas, spleen                      | 8.47 (6.36-11.28) | 2.136 | 0.146 | <0.001 |
| obstetrics, gynecology                       | 2.01 (1.5-2.68)   | 0.697 | 0.147 | <0.001 |
| orthopedic, lower extremity, pelvis          | 3.44 (2.6-4.56)   | 1.236 | 0.143 | <0.001 |
| orthopedic upper extremity, shoulder         | 1.43 (1.04-1.98)  | 0.360 | 0.164 | 0.028  |
| skin, subcutaneous, other<br>musculoskeletal | 2.18 (1.64-2.91)  | 0.780 | 0.147 | <0.001 |
| spine                                        | 3.71 (2.79-4.94)  | 1.312 | 0.145 | <0.001 |
| thoracic, non-esophageal                     | 3.38 (2.49-4.59)  | 1.218 | 0.156 | <0.001 |
| urology                                      | 3.05 (2.29-4.06)  | 1.115 | 0.146 | <0.001 |
| aorta                                        | 6.73 (4.77-9.49)  | 1.907 | 0.175 | <0.001 |
| Vascular                                     | 2.53 (1.9-3.38)   | 0.930 | 0.147 | <0.001 |
